# Rotavirus pre-symptomatically downregulates ileum-innervating sympathetic nerves concomitant with increased intestinal transit and altered brain activity

Arash Hellysaz<sup>1</sup>, Lennart Svensson<sup>1,2</sup> and Marie Hagbom<sup>1\*</sup>

<sup>1</sup> Division of Molecular Medicine and Virology, Department of Biomedical and Clinical Sciences, Linköping University, 581 85 Linköping, Sweden.

<sup>2</sup> Division of Infectious Diseases, Department of Medicine, Karolinska Institutet, 17 177 Stockholm, Sweden.

\*Address correspondence to

marie.hagbom@liu.se



1 **Abstract**

2 While diarrhea, the hallmark symptom of rotavirus infection, has been considered to occur only  
3 due to intrinsic intestinal effects, we show evidence for central control underlying the  
4 symptomology. With large-scale 3D volumetric tissue imaging a mouse model, we show that  
5 rotavirus infection disrupts the autonomic balance by downregulating the noradrenergic  
6 sympathetic nervous system in ileum, concomitant with increased intestinal transit. A most  
7 interesting observation was that nervous response from CNS occurs pre-symptomatically, an  
8 observation that bring new understanding to how virus give raise to clinical symptoms. In the  
9 CNS of infected animals, we found increased pS6 immunoreactivity in the area postrema and  
10 decreased phosphorylated STAT5-immunoreactive neurons in the bed nucleus of the stria  
11 terminalis, which are associated with autonomic control including stress response. Our  
12 observations bring new and important knowledge of how rotavirus virus infection induce gut-  
13 nerve-brain crosstalk giving raise to sickness symptoms.

## 14 Introduction

15 Rotavirus is the major cause of paediatric gastroenteritis, resulting in acute diarrhoea and  
16 vomiting. In 2019, rotavirus was estimated to have caused more than 150,000 dehydration-  
17 associated child deaths and the hospitalization of millions of children younger than 5 years old  
18 (Debellut et al., 2021). The disease mechanisms behind rotavirus-induced diarrhoea and vomiting  
19 are still not fully understood and no symptomatic treatment are available. While it is well  
20 established that diarrhoea and vomiting are the hallmarks of rotavirus infections, the extent of  
21 infection and the involvement of the central nervous system (CNS) in the illness have remained  
22 elusive.

23 Rotavirus non-structural protein 4 (NSP4) stimulates the enterochromaffin (EC) cells of the small  
24 intestine to release serotonin (Bialowas et al., 2016; Hagbom et al., 2011), which is sensed by  
25 neurons and leads to direct and indirect activation of both the enteric and central nervous systems  
26 (ENS and CNS, respectively). Consequently, it has been suggested that vomiting is elicited by  
27 gut-brain cross-talks involving the ascending and descending vagal pathways relayed through  
28 the vomiting centre in the brain (Crawford et al., 2017; Hagbom et al., 2011). Moreover, illness  
29 is not only associated with diarrhoea and vomiting, but also triggers other symptoms such as  
30 nausea, fever, anorexia and sickness symptoms, revealing a complex mechanism of disease and  
31 further indicating the participation of the CNS.

32 While intrinsic factors of rotavirus-induced diarrhoea have been investigated (Istrate, Hagbom,  
33 Vikström, Magnusson, & Svensson, 2014; S. Kordasti, Sjövall, Lundgren, & Svensson, 2004;  
34 Ove Lundgren et al., 2000) the role of CNS in rotavirus illness symptoms remain uncharted.  
35 Although the ENS drives intestinal motility independently (Wood, Alpers, & Andrews, 1999), it  
36 is *de facto* modulated centrally by the autonomic and endocrine nervous systems (Browning &  
37 Travagli, 2014). The inhibitory and excitatory effects of the autonomic nervous system on the

38 small intestine through the sympathetic and the parasympathetic systems are well established (O.  
39 Lundgren, 2000; Sharkey & Pittman, 1996; Wood et al., 1999). Normal conditions are defined by  
40 the proper balance between these two opposing systems, and balance disruption by either up- or  
41 downregulation in either system can disrupt proper motility control and lead to either diarrhoea  
42 or constipation.

43 Recent developments in tissue clearing techniques, such as iDISCO (immunolabeling-enabled  
44 three-dimensional imaging of solvent-cleared organs) (Renier et al., 2014), together with  
45 volumetric imaging of large samples with light-sheet microscopy (Fadero et al., 2018) and  
46 computer-aided analysis of big data, have enabled 3D organ-wide investigation. Here, we used  
47 these techniques to study the extent of organ-wide rotavirus infection. Furthermore, we used the  
48 same techniques to investigate the effect of rotavirus infection on the sympathetic innervation  
49 and activity of the infected small intestine in ways previously not possible. We demonstrate that  
50 rotavirus infection of the small intestine pre-symptomatically disrupts the autonomic balance by  
51 downregulating the noradrenergic sympathetic nervous system in ileum, concomitant with  
52 increased intestinal transit.

## 53 **Methods**

### 54 **Animals**

55 Five to seven-day-old neonatal mice of both sexes and 8–10-week-old female adult BALB/c  
56 mice were used. All animal experiments had been approved by the local ethical committee in  
57 Linköping, Sweden (approval no.: N141/15 and 55-15).

## 58 **Rotavirus infection**

59 The mice were orally infected with 100 diarrhoea doses (100<sub>DD</sub>) of EDIM rotavirus in 10  $\mu$ L  
60 0.9% saline as described previously (Hagbom et al., 2011; Istrate et al., 2014). Non-infected  
61 control mice were mock-infected with 10  $\mu$ L 0.9% saline. The groups were kept in separate  
62 litters, and whole litters were infected simultaneously and housed with their mother during the  
63 entire experimental period.

## 64 **Tissue preparation**

65 For iDISCO, segments of the small intestine were placed in 4% formaldehyde at room  
66 temperature for 24 h, and then transferred to phosphate-buffered saline (PBS) and stored at 4°C  
67 until tissue clearing was started.

68 For immunofluorescence, infant mice were sacrificed, and the brains were resected and fixed for  
69 48 h in 4% formaldehyde solution (Histolab, Sweden). Adult animals were perfused, and their  
70 brains resected and fixed for 2 h in 4% formaldehyde. Subsequently, the brains were transferred  
71 to 15% sucrose in PBS for 7 days at 4°C, then rapidly frozen and stored at -80°C until sectioning  
72 was performed. The brains were cut into 14- $\mu$ m thick sections on a cryostat (Microm; Walldorf,  
73 Germany), mounted on chrome alum gelatin-coated slides and stored at -20°C for subsequent  
74 immunofluorescence processing.

## 75 **Immunofluorescence**

76 The slides were thawed to room temperature, incubated in PBS, and processed for conventional  
77 indirect immunofluorescence or tyramide signal amplification (TSA; Perkin Elmer, Waltham,  
78 MA, USA) protocols as described previously (Foo, Hellysaz, & Broberger, 2014). All reactions  
79 were performed at room temperature unless otherwise stated. Primary antisera cocktails were

80 prepared in staining buffer containing 0.03% Triton X-100 in 0.01 M PBS with 1% bovine serum  
81 albumin at least 24 h before use.

82 For conventional immunofluorescence, the sections were incubated in primary antisera at 4°C for  
83 16 h, rinsed in PBS for 30 min, incubated for 1 h in secondary antisera cocktail, diluted in  
84 staining buffer, incubated in 4',6-diamidino-2-phenylindole (DAPI, 1:10,000 in PBS), rinsed in  
85 PBS for 30 min, and mounted with 2.5% 1,4-diazabicyclo[2.2.2]octane (DABCO, Sigma, St.  
86 Louis, MO, USA) anti-fade agent in glycerol.

87 For TSA, antigen retrieval was initially performed with Tris-HCl (pH 8.0) at 95°C for 5 min. The  
88 sections were subsequently washed in Tris-sodium chloride-Tween buffer (TNT; 0.1 M Tris,  
89 0.15 M NaCl, 0.05% Tween 20), incubated in primary antisera at 4°C for 42 h, washed in TNT,  
90 pre-incubated with blocking buffer (TNB) supplied in the TSA Plus kit (Perkin Elmer) for 30  
91 min, incubated for 2 h in secondary antisera cocktail diluted in TNB, rinsed with TNT buffer, and  
92 incubated for 10 min with tyramide-conjugated fluorescein (1:500 in amplification diluent as  
93 supplied with the TSA Plus kit). The sections were then stained for DAPI and mounted as  
94 described above.

## 95 **iDISCO**

96 Approximately 5-mm long intestinal tissue samples from the duodenum and ileum were  
97 processed for iDISCO (Renier et al., 2014) according to the May 2016 updated protocol  
98 (available at <http://www.idisco.info/>), with some modifications. Briefly, the samples were  
99 dehydrated with gradient methanol, bleached in chilled fresh 5% H<sub>2</sub>O<sub>2</sub> in methanol overnight at  
100 4°C, and rehydrated and washed in PBS with 10 mg/L heparin and 0.2% Tween 20.  
101 Subsequently, the samples were permeabilized for 1 day, blocked for 1 day, incubated in primary

102 antibody at 42°C for 7 days, washed, incubated in secondary antisera at 42°C for 7 days, and  
103 washed.

104 Following methanol gradient dehydration, the samples were incubated for 3 h in 66%  
105 dichloromethane in methanol, 2 × 15 min in 100% dichloromethane, and transferred to dibenzyl  
106 ether. All samples used for final analysis were processed in parallel and treated with the same  
107 buffers and solutions.

### 108 **FITC-dextran transit**

109 At 16 h p.i., the animals were orally administered 10 µL freshly prepared 4-kDa FITC-dextran  
110 (FD-4s, Sigma) dissolved in Milli Q water, at a dose of 0.25 mg/animal. After 15 min, the  
111 animals were sacrificed and the entire intestine, from the stomach to the rectum, was removed  
112 and visualized with ultraviolet light in a ChemiDoc XRS system (Bio-Rad, Sweden). The front  
113 part of the main accumulating FITC-dextran was defined from the photo, and the software  
114 program Adobe Illustrator was used to exactly measure the intestinal length and migration of the  
115 FITC-dextran probe. Intestinal transit was calculated on how far the FITC-dextran probe has  
116 passed as a percentage of the entire length of the intestine, from the pylorus to the rectum (Istrate  
117 et al., 2014).

### 118 **Antisera**

119 All antisera used in the different protocols are presented in Table 1. For detection, Alexa Fluor-  
120 conjugated secondary antisera (Life Technologies, Carlsbad, California, United States) for  
121 conventional detection, and horseradish peroxidase-conjugated secondary antisera (Dako,  
122 Glostrup, Denmark) for TSA were used. All secondary antisera were diluted to 1:500 for IHC  
123 and TSA and 1:250 for iDISCO.



124 **Table 1.** Primary antisera used in the study.

| ANTIGEN | SPECIES    | SUPPLIER               | IHC    | TSA   | iDISCO |
|---------|------------|------------------------|--------|-------|--------|
| pS6     | Rabbit     | Thermo (44-923G)       | 1:1000 |       |        |
| pSTAT5  | Rabbit     | Cell Signalling (9359) |        | 1:500 |        |
| VP6     | Guinea Pig | In house (bleed 97.3)  | 1:1000 |       | 1:100  |
| TH      | Rabbit     | Millipore (AB152)      | 1:2000 |       | 1:100  |
| TH      | Mouse      | Millipore (MAB318)     | 1:2000 |       |        |

125 TH; tyrosine hydroxylase, TSA; tyramide signal amplification, IHC; immunohistochemistry.

126

## 127 **Microscopy**

128 Wide-field image montages were automatically generated in NeuroLucida computer software  
129 (MBF Bioscience, Williston, VT, USA) by taking consecutive pictures with an automated stage  
130 controller mounted on a Zeiss Axio Imager M1 (Carl Zeiss, Oberkochen, Germany). Confocal  
131 micrographs were captured using a Zeiss LSM 800 Airyscan microscope with Zen Blue  
132 computer software. Light-sheet micrographs were acquired with a UltraMicroscope II (LaVision  
133 Biotec, Bielefeld, Germany) setup using ImSpector computer software. All intestinal tissues were  
134 randomized and sampled consecutively with the same acquisition settings. Post-acquisition  
135 brightness/contrast adjustments were performed uniformly on all light-sheet micrographs.

## 136 **Micrograph analysis**

137 The fluorescence micrographs were post-processed for rotation and brightness/contrast in  
138 Photoshop (Adobe, San Jose, California, United States) and analyzed in QuPath computer  
139 software (Bankhead et al., 2017).

140 We performed 3D confocal and light sheet analyses in Imaris. To maintain uniform tissues and  
141 measurements between animals, intestinal tissue integrity was visually confirmed in 3D, and

142 damaged segments lacking an intact myenteric plexus (Figure S4) were excluded from analysis.  
143 Furthermore, the reconstructed 3D models were trimmed *in silico*, and only fragments with fully  
144 intact submucosa and myenteric plexuses were used. Therefore, mucosal immunofluorescence  
145 from, for example, enteric dopaminergic cells (Figure 2g) and intense fluorescence from  
146 incoming axon bundles (compare Figure 1j, k) were not included in the analysis and did not  
147 falsely skew the results.

148 Two different approaches were used to assess the level of infection in the small intestine. First,  
149 the number of infected cells per volume was estimated from the total number of infected surfaces  
150 and the total volume of the analyzed tissue. For a more accurate estimation, we set the infected  
151 surface creation pipeline to consider cell diameter and split touching objects (see parameters and  
152 threshold settings in Figure S5). In the second approach, the tissue infection ratio was estimated  
153 based on the total volume occupied by rotavirus relative to the total tissue volume. This approach  
154 for estimating the level of infection is independent of cell size and is therefore prone to  
155 methodological errors introduced by the splitting algorithm, from which the first approach might  
156 suffer from. Both non-infected and infected sample were analyzed with the same analysis  
157 pipeline.

## 158 **Statistical analysis**

159 Statistical analysis was performed with Prism (GraphPad, San Diego, California, United States)  
160 computer software. Statistical significance was set at  $p < 0.05$  and was determined using the  
161 statistical tests described in the figures (\* $p < 0.05$ ; \*\* $p < 0.01$ ; \*\*\* $p < 0.001$ ; ns, not significant).  
162 The statistics are reported as the mean  $\pm$  standard error of the mean (SEM); n corresponds to the  
163 number of animals unless indicated otherwise.

## 164 **Data availability**

165 Data is available from the corresponding author upon request.

## 166 **Results**

### 167 **Rotavirus infection is widespread throughout the entire length of the small intestine at 16 h** 168 **post infection.**

169 Light-sheet micrograph stacks of the duodenum (Figure 1a, b, Supplementary Video 1) with 3D  
170 reconstruction (Figure 1c), and the ileum (Figure 1d, Supplementary Video 2-3) with 3D  
171 reconstruction (Figure 1e, Supplementary Video 4), immunostained for rotavirus structural viral  
172 protein 6 (VP6), indicated uniform and widespread infection throughout the entire length of the  
173 small intestine. VP6 immunoreactivity was not observed in non-infected animals (Figure 1f).  
174 Notably, the presence of VP6 was restricted to the mucosa, and no immunoreactivity was  
175 observed in the intestinal wall (Figure 1g).

176 Next, the extent of infection was investigated. To quantify the level of rotavirus infection, light-  
177 sheet micrographs were processed in Imaris (Bitplane, Zürich, Switzerland), and 3D surface  
178 models based on voxel fluorescence intensity were automatically created (Figure 1c, e, h-k). The  
179 tissue was modelled using autofluorescence. The level of infection was assessed with two  
180 different approaches, where number of infected cells (Figure 1l) or tissue infection ratio (Figure  
181 1m) for non-infected ( $n = 5$ ) and infected ( $n = 5$ ) duodenum and ileum was estimated. Notably,  
182 both approaches generated similar results and yielded the same conclusions (compare Figure S1).

183 The estimated number of infected cells was  $8504 \pm 1615$  in the duodenum and  $17,458 \pm 6058$  in  
184 the ileum (Figure 1l). Likewise, the estimated tissue infection ratio was  $5.8 \pm 1.0\%$  in the  
185 duodenum and  $8.6 \pm 3.5\%$  in ileum (Figure 1m). Therefore, our data show no statistically  
186 significant differences in the level of rotavirus infection between the duodenum and the ileum.

187

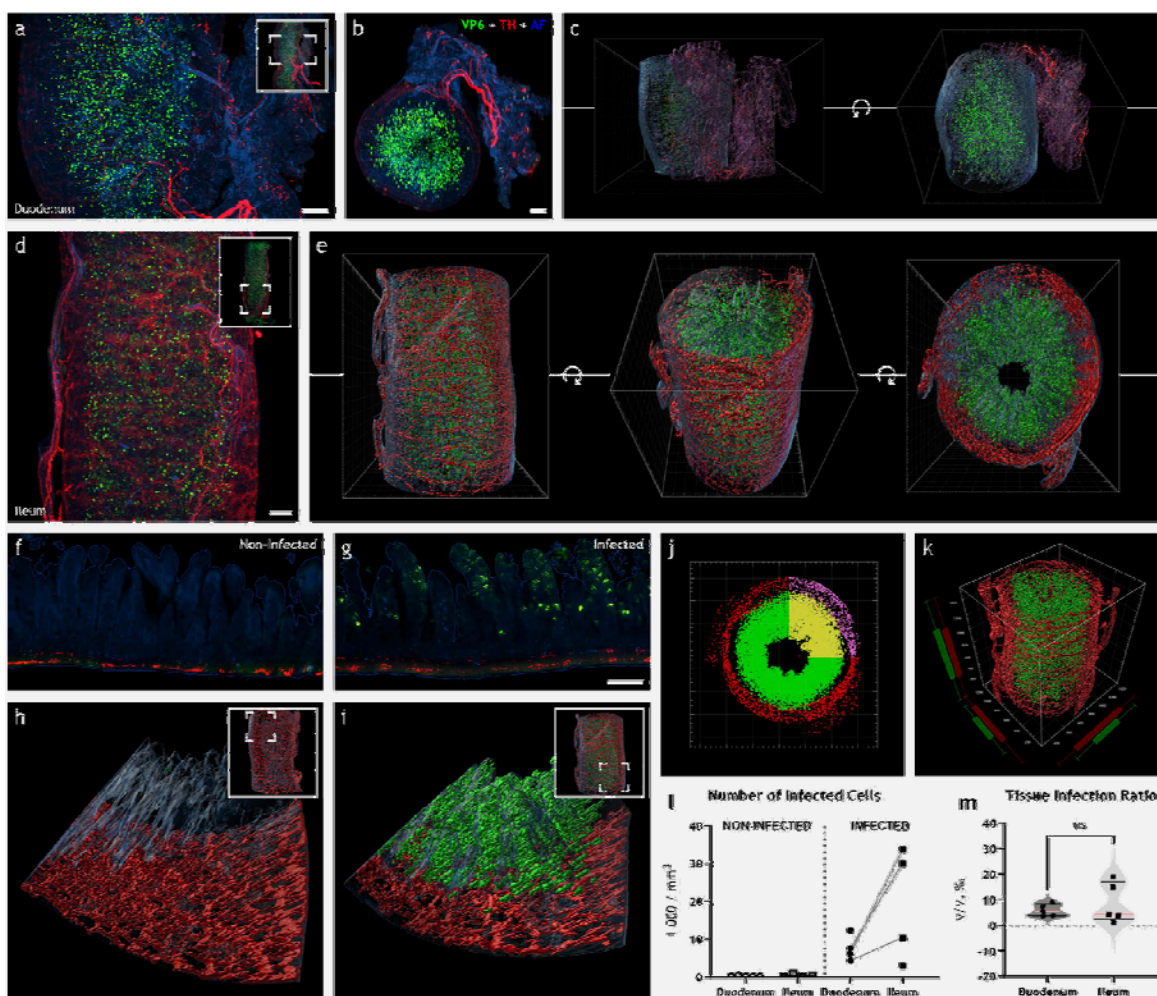

188

189

**Figure 1. Rotavirus infection is widespread throughout the entire length of the small intestine at 16 hours post infection.**

190

191

Maximum intensity projection of light-sheet micrograph stacks (a, b, d) from rotavirus-infected mouse duodenum (a,

192

b) and ileum (d) stained for rotavirus VP6 (green) and TH (red), the rate-limiting enzyme in catecholamine

193

biosynthesis. Tissue was visualized with autofluorescence (AF; blue). Insets show low-power micrographs denoting

194

enlarged regions in the panel with a box. 3D surface reconstruction from (a, b) and (d) is shown in (c) and (e),

195

respectively. Rotation along the z-axis is denoted with (U). Note the high degree of rotavirus infection in the

196

duodenum (a-c) and ileum (d, e). Single optical slice (f, g) and surface 3D reconstruction (h, i) of infected (g, i) and

197

non-infected (f, h) ileum. Imaparis vantage plots (j, k) from infected ileum. Note the regions used for analysis marked

198

with yellow/purple, excluding, for example, incoming axon bundles. Rotavirus infection was quantified by

199

estimating the relative number of infected cells (l) or the tissue infection ratio (m). Data points from the same animal

200

are connected with a line. The two-tailed paired *t*-test yielded no significant difference in the relative number of

201 infected cells (**l**;  $p = 0.1026$ ) or tissue infection ratio (**m**;  $p = 0.1826$ ). Scale bar in (**a**, **b**, **d**) = 50  $\mu\text{m}$ ; in (**g**) = 100  $\mu\text{m}$   
202 for (**f**, **g**).

### 203 **Rotavirus infection induces downregulation of the noradrenergic sympathetic neurons in** 204 **ileum.**

205 The main clinical outcome of gastrointestinal rotavirus infection is diarrhoea, which is caused by  
206 altered intestinal secretion and motility (Crawford et al., 2017). As both secretion and motility  
207 can be modulated by the autonomic nervous system (Browning & Travagli, 2014), we  
208 determined whether rotavirus infection would affect the sympathetic nervous afferents  
209 innervating the small intestine.

210 Within the intestinal wall, all tyrosine hydroxylase (TH), *i.e.*, the rate-limiting enzyme of  
211 noradrenalin biosynthesis (Levitt, Spector, Sjoerdsma, & Udenfriend, 1965; Nagatsu, Levitt, &  
212 Udenfriend, 1964), reside within the axons of the sympathetic neurons, and extrinsic sympathetic  
213 denervation of the ileum abolishes all traces of TH (Mann & Bell, 1993). We measured the total  
214 TH immunoreactivity in 3–4 mm long pieces of the intestinal wall with volumetric 3D imaging  
215 (see Supplementary Video 1-7) to assess the extent of sympathetic modulation of the rotavirus-  
216 infected small intestine.

217 Surprisingly, in non-infected animals (Figure 2a–d), we observed a clear difference in TH  
218 immunoreactivity between the duodenum and ileum. This difference was not obvious in the  
219 infected animals (Figure 1e–h). The measured fluorescence intensity (Figure 1i) was  $2155 \pm 89$   
220  $\text{au}/\mu\text{m}^3$  in the duodenum ( $n = 5$ ) and was significantly higher ( $4601 \pm 483 \text{ au}/\mu\text{m}^3$ ) in the ileum  
221 ( $n = 5$ ) of the non-infected animals. In the duodenum of the infected animals ( $n = 5$ ), the  
222 fluorescence intensity was  $2319 \pm 128 \text{ au}/\mu\text{m}^3$ . Accordingly, no significant differences in TH  
223 immunoreactivity could be observed in the duodenal wall of the infected *vs.* non-infected

224 animals.

225

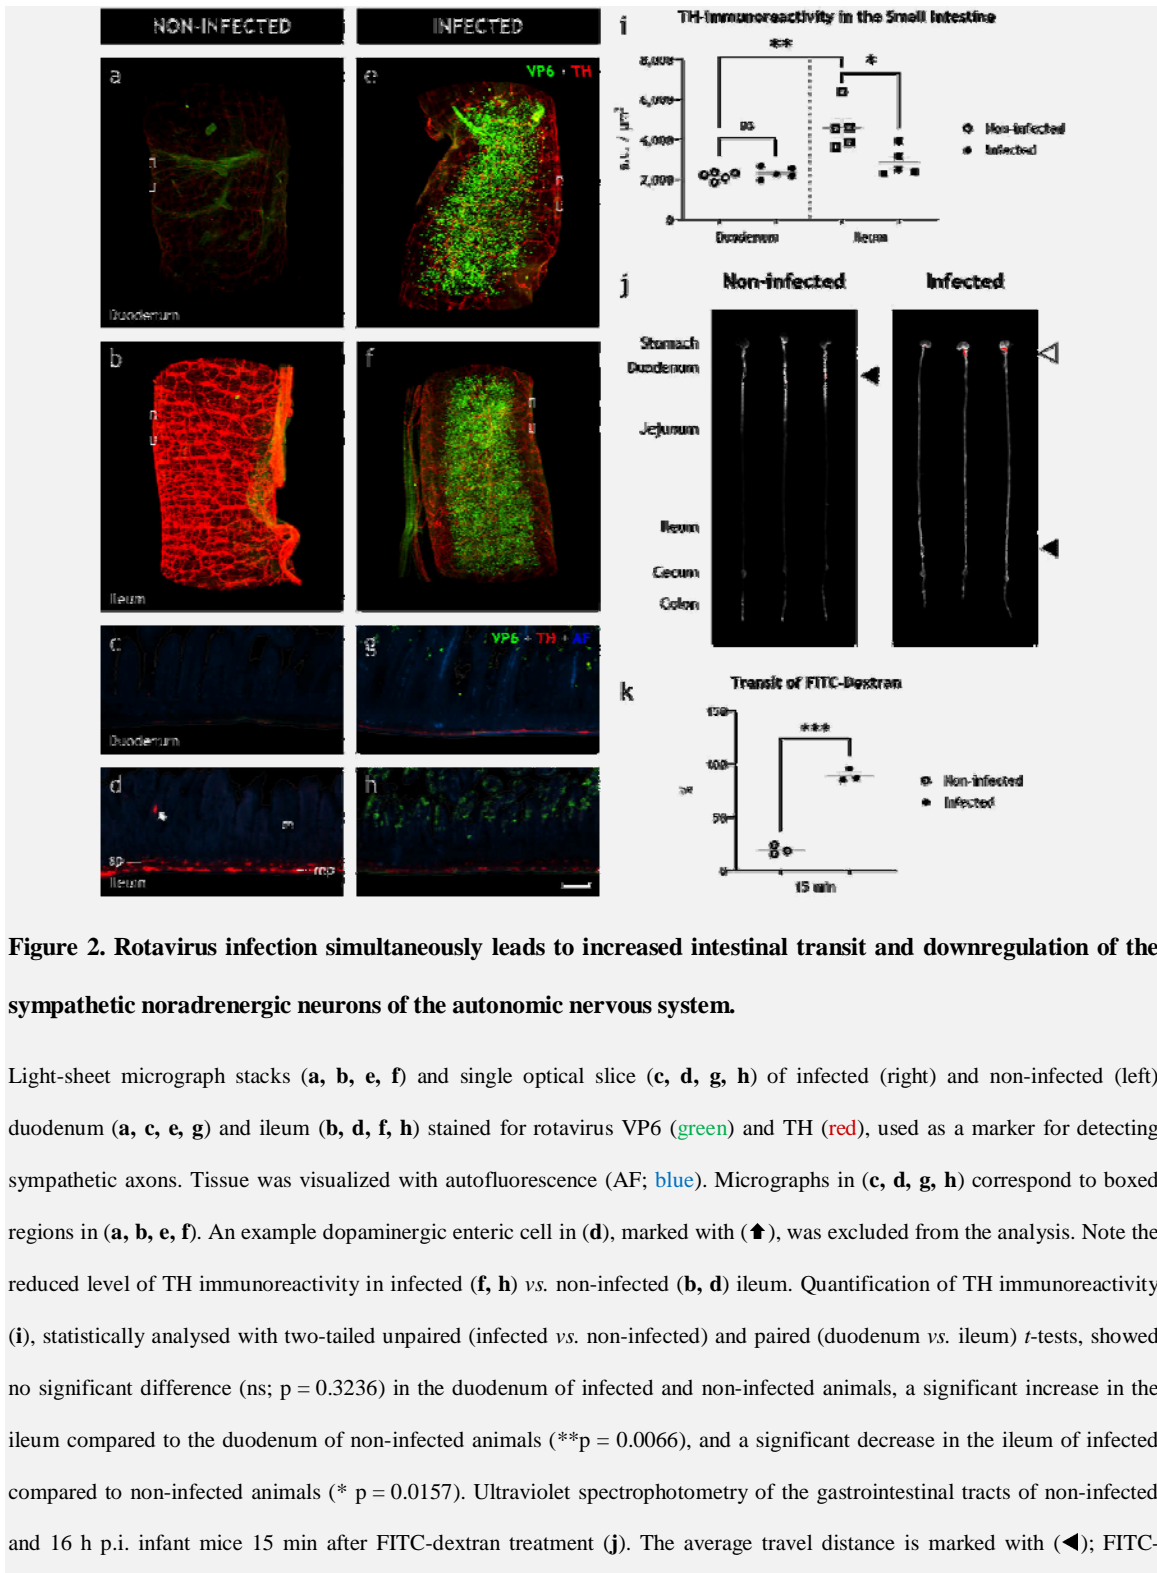

239 dextran remnants in the stomach are marked with (<math>\blacktriangleleft</math>). Transit of FITC-dextran relative to the entire length of the intestine  
240 statistically analysed with the two-tailed unpaired *t*-test with Welch's correction (**k**) showed a significant (\*\*\*) $p = 0.0001$   
241 increase in the intestinal motility of the infected animals. m, mucosa; mp, myenteric plexus; sp, submucosal plexus. Scale bar  
242 in (**h**) = 100  $\mu\text{m}$  for (**e-h**).

243 The immunoreactivity in the ileum of the infected animals ( $n = 5$ ), however, was  $2850 \pm 309 \text{ au}/\mu\text{m}^3$ .  
244 Hence, rotavirus infection led to a significant decrease of TH immunoreactivity in the ileum, but not in  
245 the duodenum (see Figure 2a–i). Relative to the average immunoreactivity levels of the uninfected  
246 animals, we observed this decrease, which ranged 15–50%, in all infected animals (Figure S2). These  
247 data show that rotavirus infection causes robust downregulation of the sympathetic nervous system  
248 innervating the ileum.

249 **Downregulation of the sympathetic nervous system is concomitant with increased intestinal**  
250 **motility.**

251 As intestinal motility can be both increased and decreased by the autonomic nervous system (O.  
252 Lundgren, 2000; Sharkey & Pittman, 1996; Wood et al., 1999), we next investigated if the  
253 rotavirus-induced alteration of the sympathetic nervous system was concomitant with altered  
254 intestinal motility *in vivo* by utilizing the well-established fluorescein isothiocyanate (FITC)-  
255 dextran intestinal transit model (Hagbom et al., 2020; Istrate et al., 2014). Spectro photographs of  
256 resected intestines from animals 16 h post-infection (h p.i.), which had received oral FITC-  
257 dextran 15 min prior to termination, clearly showed increased FITC-dextran transit in infected *vs.*  
258 non-infected animals (Figure 2j).

259 The estimated mean relative transit distance (Figure 2k) was 19.1% in the non-infected animals  
260 ( $n = 3$ ) and 89.2% in the infected animals ( $n = 3$ ). Hence, the infected animals exhibited  
261 statistically significantly increased intestinal motility ( $p = 0.0001$ ) concomitant with reduced  
262 sympathetic activity. Notably, the infected animals also showed signs of delayed gastric  
263 emptying, visualized by high amounts of remnant FITC-dextran in the stomach (Figure 2j).



264 **Oral rotavirus infection modulates discrete regions of the brain.**

265 The cell bodies of postganglionic sympathetic neurons that innervate the small intestine wall are  
266 located in the prevertebral ganglia (Jänig, 1988; Mann & Bell, 1993; Trudrung, Furness,  
267 Pompolo, & Messenger, 1994) and receive innervation from the CNS (Berthoud & Powley,  
268 1996; Trudrung et al., 1994). Therefore, we hypothesized that the increased intestinal motility  
269 associated with the downregulation of sympathetic nerves during rotavirus infection might be  
270 partly controlled by the CNS. To address this question, we investigated the brains of infected and  
271 non-infected adult mice using immunohistochemistry for markers of nerve activity.

272 First, ribosomal protein S6, whose phosphorylated state (pS6) is emblematic of active neurons  
273 and parallels expression of the immediate early gene *cFos* (Knight et al., 2012), was investigated  
274 throughout the entire brain. Although a full rostro-caudal survey of the brains of the infected and  
275 non-infected animals revealed few differences in the immunoreactivity pattern of pS6 (see *e.g.*  
276 Figure 3a, b), we observed a significant ( $p = 0.0233$ ) increase in pS6 immunoreactivity in the  
277 area postrema of the infected animals at 48 h p.i. (Figure 3c–f). Within the area postrema,  
278 number of pS6-immunoreactive cells per section significantly increased ( $p = 0.0233$ ) from  
279  $21.3 \pm 9.2$  in non-infected animals ( $n = 3$ ) to  $154.7 \pm 47.7$  in infected animals ( $n = 3$ ).

280 As immediate early genes such as *cFos*, and likewise phosphorylation of S6, mark activation in  
281 short time frames (hours), while rotavirus infection lasts for days, we next investigated evidence  
282 for transcriptional modulations in select brain areas known to control endocrine and autonomic  
283 nervous systems. Members of the signal transducer and activator of transcription (STAT) protein  
284 family are primarily phosphorylated by the activation of Janus kinase-associated membrane  
285 receptors, and the activation of several hypothalamic pathways, particularly regarding feeding  
286 behaviour (Furigo, Ramos-Lobo, Frazão, & Donato, 2016), is associated with phosphorylated

287 STAT5 (pSTAT5). We therefore investigated the number of cells expressing pSTAT5 in various  
288 brain areas of infected and non-infected animals.

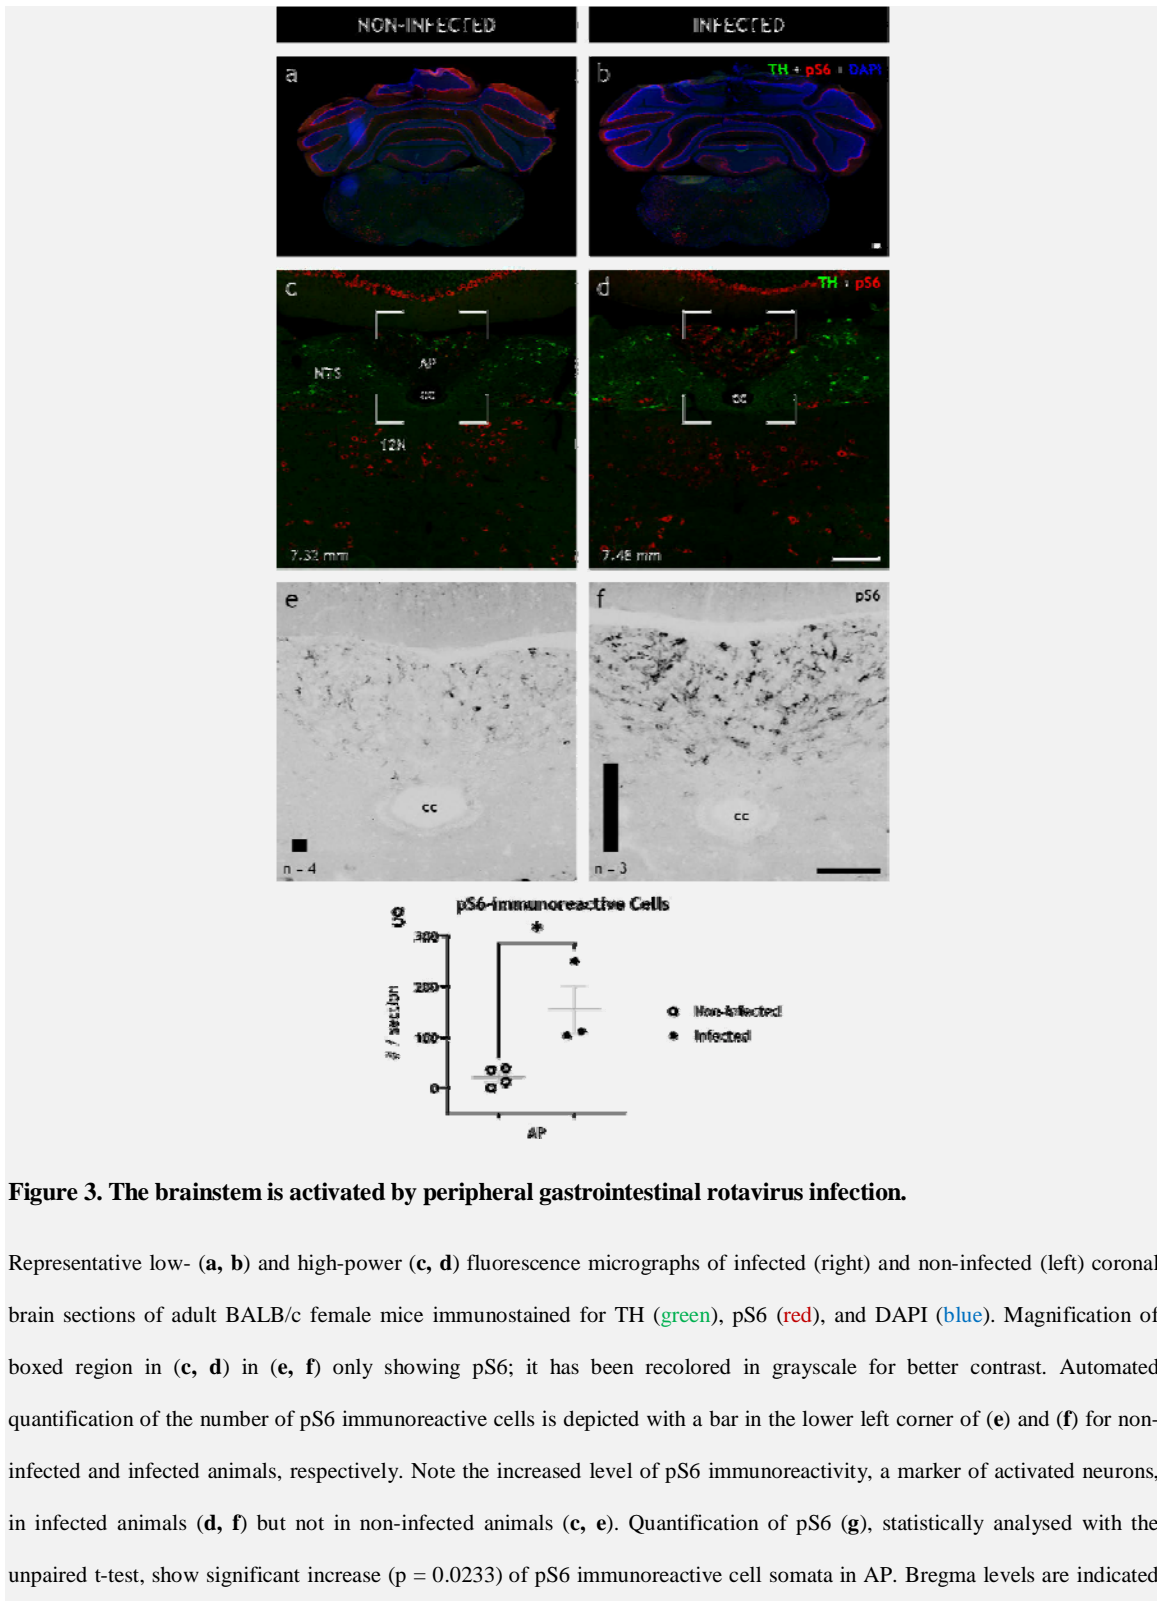

298 in the lower left corner. 12N, hypoglossal nucleus; AP, area postrema; cc, central canal; NTS, nucleus of the solitary tract.  
299 Scale bar in (b) = 100  $\mu$ m for (a, b), in (d) = 100  $\mu$ m for (c, d), and in (f) = 50  $\mu$ m for (e, f).

300

301 We found pSTAT5 immunoreactive cell somata (Figure 4) in the bed nucleus of stria terminalis  
302 (BNST) of all non-infected animals ( $n = 4$ ) with an average of  $6.8 \pm 1.7$  cells per 14- $\mu$ m section.  
303 Conversely, in the BNST of infected animals ( $n = 4$ ), we observed a complete and robust absence  
304 ( $p = 0.0286$ ) of pSTAT5 immunoreactive cells (Figure 4). No significant difference was  
305 observed in pSTAT5-expressing hypothalamic nuclei, including the arcuate, paraventricular, and  
306 periventricular nuclei, as well as the medial preoptic and the anteroventral periventricular areas  
307 (Figure S3). Notably, some of these regions showed a high degree of variability among the  
308 animals.

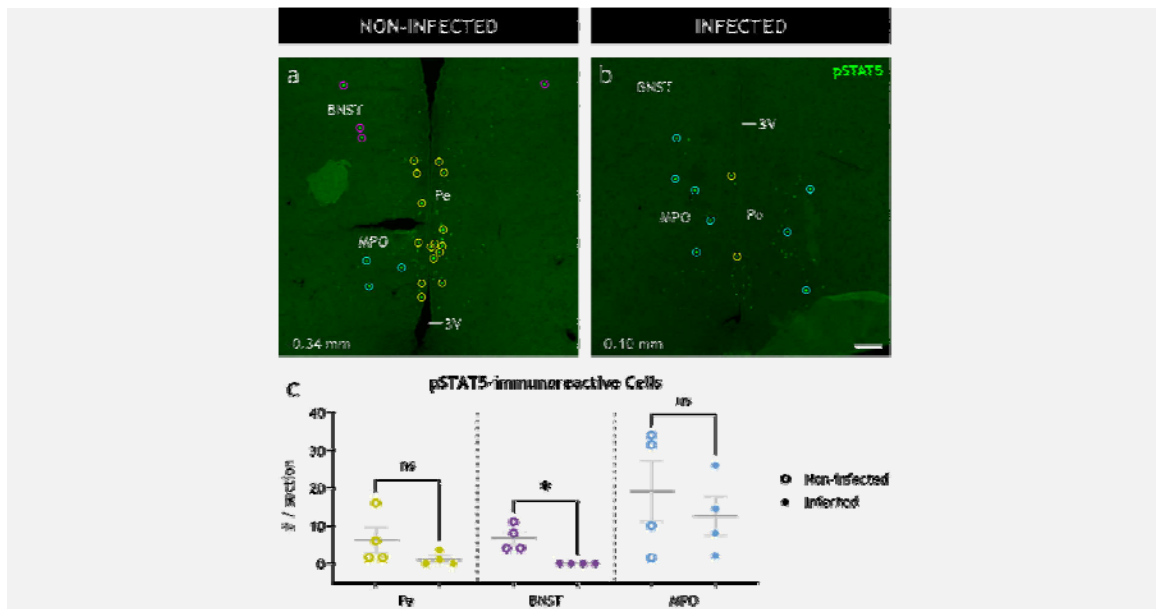

309

310 **Figure 4. Peripheral gastrointestinal rotavirus infection modulates distinct neuronal populations in the CNS.**

311 Representative low-power confocal micrographs of non-infected (a) and infected (b) coronal brain sections immunostained for  
312 pSTAT5 (green), a marker of activated neurons. The immunoreactive cell somata (enclosed in circles) were detected  
313 automatically and registered to the corresponding nucleus manually. Quantification of pSTAT5 immunoreactive cell somata  
314 (c) was statistically analysed with the two-tailed Mann-Whitney test. Note the significant decrease ( $p = 0.0286$ ) of pSTAT5  
315 immunoreactive cell somata in the BNST, but not the other regions. Bregma levels are indicated in the lower left corner. 3V,

316 third ventricle; BNST, bed nucleus of stria terminalis; MPO, medial preoptic area; Pe, periventricular hypothalamic nucleus.

317 Scale bar in (b) = 100  $\mu$ m for (a, b).

318

### 319 **Rotavirus-induced modulation of the CNS is not caused by brain infection.**

320 While our data suggest that rotavirus-induced increase of intestinal motility is associated with  
321 nervous gut–brain communication, we cannot completely rule out the idea that the virus can  
322 reach the brain via the blood and thereby trigger the CNS. Despite little previous evidence for  
323 extramucosal spread of EDIM rotavirus (Uhnoo et al., 1990), and the lack of reports of viremia at  
324 16 h p.i., we investigated this possibility with immunohistochemistry. Full rostro-caudal  
325 immunohistochemical investigation of fixed neonatal brains at 16 h p.i. (n = 5) and 48 h p.i. (n =  
326 4) did not revealed any evidence of rotavirus VP6 antigen (Figure 5), nor perfused adult brains  
327 (n = 5) at 48 h p.i. (data not shown).

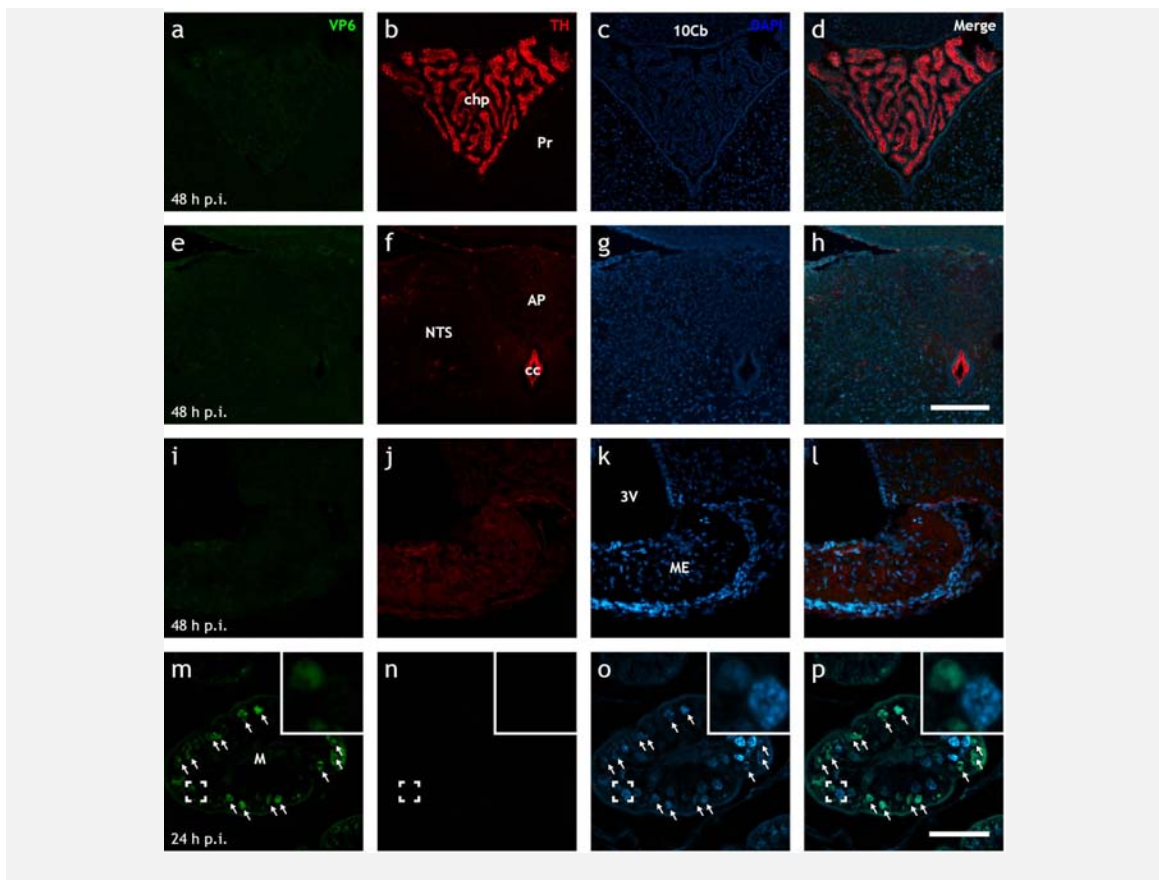

329 **Figure 5. Up to 48 h post infection, EDIM rotavirus is not detected in the brain.**

330 Representative low-power Airyscan confocal micrographs of rotavirus-infected neonatal mouse brain (**a-l**) and

331 ileal (**m-p**) sections stained for rotavirus VP6 (**green; a, e, i, m**), TH (**red; b, f, j, n**), and DAPI (**blue; c, g, k, o**).

332 Merge of each row is shown in (**d, h, l, p**). Note the presence of rotavirus-infected cells in the ileum (**↑; m-p**) 24 h

333 p.i., but the lack thereof in various areas of the brain as late as 48 h p.i. (**a-l**). 10Cb, 10<sup>th</sup> lobe of the cerebellum;

334 3V, third ventricle; AP, area postrema; cc, central canal; chp, choroid plexus; M, mucosa; ME, median eminence;

335 NTS, nucleus of the solitary tract; Pr, prepositus nucleus. Scale bar in (**h**) = 100  $\mu$ m for (**a-h**) and in (**p**) = 50  $\mu$ m

336 for (**i-p**).

## 337 Discussion

338 Previous studies have investigated the mechanisms of rotavirus diarrhoea mainly by focusing on

339 the intrinsic intestinal effects (Ball, Tian, Zeng, Morris, & Estes, 1996; Chang-Graham et al.,

340 2019, 2020; Hagbom et al., 2020, 2011; Istrate et al., 2014; Shirin Kordasti et al., 2006; Ove

341 Lundgren et al., 2000). Although these observations are compelling and have provided important

342 mechanistic information of rotavirus diarrhoea, no information is available on how the gut

343 communicate with CNS before the onset of diarrhoea nor how this communication initiates the

344 illness. By using novel, large-scale volumetric 3D tissue clearing and imaging techniques, we

345 studied the pathophysiology of rotavirus gastroenteritis. We show that rotavirus infection pre-

346 symptomatically disrupts the autonomic balance by downregulating the noradrenergic

347 sympathetic nervous system in ileum, concomitant with increased intestinal transit. In the CNS of

348 infected animals, we found increased pS6 immunoreactivity in the area postrema, and decreased

349 phosphorylated STAT5-immunoreactive neurons in the BNST, which has been associated with

350 autonomic control including stress response. Altogether, these observations reveal that rotavirus

351 signal to CNS before onset of diarrhoea a surprising observation that bring new understanding to

352 how virus give raise to clinical symptoms.

353 Our 3D illustrations (compare Supplementary Video 1-7) identify a previously unappreciated  
354 early widespread infection. Furthermore, our data show that all segments of the small intestine  
355 are infected synchronously and demonstrate that the infection triggers neuronal circuitries  
356 through the CNS many hours before the development of diarrhoea. These observations are  
357 supported clinically, as the well-established early symptoms of rotavirus illness preceding  
358 diarrhoea are fever, and nausea/vomiting (stanfordchildrens.org), which are likely to be caused  
359 by early gut–brain cross-talks.

360 The endpoint neurotransmitter of the sympathetic nervous system is noradrenalin (Gershon,  
361 1967; Mann & Bell, 1993). However, as measuring released noradrenalin in the small intestine of  
362 infected neonatal mice is challenging due to technical limitations, and released noradrenalin  
363 cannot be visualized easily, we chose to investigate the sympathetic system by targeting TH.  
364 Since TH is the rate-limiting enzyme of catecholamine biosynthesis (Daubner, Lauriano,  
365 Haycock, & Fitzpatrick, 1992; Levitt et al., 1965; Nagatsu et al., 1964), its expression level  
366 defines the maximum amount of available neurotransmitter in the cell. Moreover, within the  
367 small intestinal wall, TH can only be found in the sympathetic axons (Mann & Bell, 1993), and  
368 extrinsic sympathetic denervation of the ileum abolishes all TH immunoreactivity in the  
369 intestinal wall. Therefore, our measurements do not appear to be attributed to intrinsic intestinal  
370 nerves or any other systems than the sympathetic system. Furthermore, the cell somata of  
371 intestinal sympathetic axons receive input from the CNS and are located in the prevertebral  
372 ganglia in close proximity to the spinal cord (Jänig, 1988), far from the site of action and  
373 shielded from direct viral influence.

374 By targeting TH, our 3D reconstructions are directly and exclusively correlated to the  
375 noradrenergic sympathetic outputs to the small intestine, which we found were downregulated  
376 specifically in the ileum, but not in the duodenum, of the rotavirus-infected animals. Occurring

377 within 16 h p.i., this downregulation ranged 15–50% compared to non-infected animals. How  
378 this downregulation translates to actual noradrenalin concentration in the cell, and how much  
379 noradrenalin is released at the axon terminals, cannot be elucidated from our data. Nonetheless,  
380 both clinical data and animal experiments (Istrate et al., 2014) show that the post-infection onset  
381 of diarrhoea can vary and occurs between 24 and 48 h.

382 Notably, we could not find any significant differences in TH immunoreactivity in the duodenum  
383 between the infected and non-infected animals, suggesting a tissue-specific rather than general  
384 downregulation. Indeed, intestinal segment-specific regulation was reported in 1857 by Eduard  
385 Pflüger, who noted that the activation of sympathetic innervation inhibited motility but  
386 constricted sphincters (Browning & Travagli, 2014; Jänig, 1988).

387 The inhibitory effect of the noradrenalin from the sympathetic nervous system on the small  
388 intestine is well established (Gershon, 1967; Kadowaki, Yoneda, & Takaki, 2003). Early  
389 histochemical investigations have determined that axons of the sympathetic postganglionic  
390 neurons are present in the submucosal and myenteric plexuses, and also extend to the villi in the  
391 mucosa (Schultzberg et al., 1980). Furthermore, functional and pharmacological studies show  
392 that noradrenalin mainly acts on  $\alpha_1$ -adrenergic receptors to excite myenteric neurons and thereby  
393 increase intestinal motility (Furuichi et al., 2001; Schemann, 1991). Further, enteric glia both  
394 regulate gastrointestinal motility (Gulbransen & Sharkey, 2012) and express adrenergic receptors  
395 (Nasser, Ho, & Sharkey, 2006). Indeed, rotavirus activates enteric glia cells via serotonin  
396 (Hagbom et al., 2020). Altogether, this suggests that noradrenalin simultaneously acts on enteric  
397 neurons and glia cells, parasympathetic axons and smooth muscle cells to coordinately inhibit  
398 intestinal motility. In accordance with our data, reducing the available noradrenalin will remove  
399 these inhibitions, *i.e.* remove the brake, and shift the balance towards increased intestinal  
400 motility, as illustrated in Figure 6.

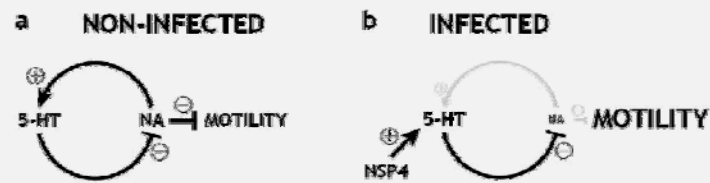

401

402 **Figure 6. Sympathetic feedback loop is disrupted in ileum during infection.**

403 Schematic representation of the sympathetic feedback loop at enterochromaffin (EC) cells. In normal conditions (a),  
404 sympathetic noradrenalin (NA) will stimulate the release of serotonin (5-HT) from the EC cells, which will act on the  
405 ascending vagal pathways to inhibit the excessive release of noradrenalin. During infection, NSP4 will disrupt the autonomic  
406 balance by circumventing noradrenalin and inducing the continuous release of serotonin. This will cause reduced sympathetic  
407 tone, which will leave the parasympathetic nervous system to stimulate intestinal motility unhindered and cause diarrhoea.

408

409 We observed increased pS6 immunoreactivity in area postrema and decreased number of  
410 pSTAT5 immunoreactive cell somata in the BNST and no rotavirus antigen in CNS. Based on  
411 these observations we conclude that the sympathetic downregulation in the intestine resulted  
412 from gut-brain nervous signalling rather than direct infection and/or cytokine stimulation. This  
413 conclusion is supported by the fact that rotavirus is associated with limited inflammatory  
414 response in both human and mice (Greenberg & Estes, 2009; Hagbom et al., 2021; O. Lundgren,  
415 2000; Ove Lundgren & Svensson, 2001; Morris & Estes, 2001), and that the EDIM murine  
416 rotavirus strain used in the present study has not been associated with extramucosal spread earlier  
417 than 72 h p.i. (Kraft, 1958) nor hepatic infiltration (Uhnoo et al., 1990).

418 Abnormal gastric motor function, as manifested by delayed emptying, has been reported in  
419 rotavirus-infected children (Bardhan, Salam, & Molla, 1992), and has been proposed to be  
420 associated with gastrointestinal hormones, neuronal pathways (including non-cholinergic and  
421 non-adrenergic), vagal neurons, and CNS control. The precise mechanisms, remain unresolved  
422 (Crawford et al., 2017). The FITC-dextran remnants in the stomach of the infected animals  
423 (Figure 2j, k) suggest the occurrence of delayed gastric emptying during the early stages of



424 infection. Together with our other data showing downregulation of the sympathetic nervous  
425 system in the ileum, it strengthens the view of nerves participating in rotavirus illnesses.  
426 Altogether, our data suggest altered autonomic control as the underlying cause of other  
427 symptoms as well, and further investigation of the stomach, for example, is warranted.

428 Interestingly, we found a strong reduction of pSTAT5 immunoreactive cell somata in the BNST  
429 of infected animals (Figure 4). Spinal neuron projections directly to the BNST have been  
430 reported (Menétrey & de Pommery, 1991). Further, BNST sends projections to the dorsal motor  
431 nucleus of the vagus (Hopkins & Holstege, 1978), the nucleus ambiguus (Holstege, Meiners, &  
432 Tan, 1985), and the nucleus of the solitary tract (Hopkins & Holstege, 1978), *i.e.*, the brain centra  
433 involved in controlling gastrointestinal motility (Browning & Travagli, 2014; Gillis, Quest,  
434 Pagani, & Norman, 2011). Furthermore, the BNST is involved in several autonomic regulations  
435 responding to non-fear-associated stress, and alters both blood pressure (Koikegami, Kimoto, &  
436 Kido, 1953) and heart rate. Our data showing modulation of the BNST in response to rotavirus  
437 infection strengthens the view of BNST involvement in intestinal motility and possibly  
438 symptoms of illness.

439 EC cells of the small intestine modulate neuronal signalling, including intestinal motility and  
440 secretion. Rotavirus, as well as NSP4, stimulates serotonin release from EC cells (Chang-  
441 Graham et al., 2019, 2020; Hagbom et al., 2011) and directly modulates ascending vagal  
442 pathways (Crawford et al., 2017; Hagbom et al., 2011). EC cells also receive direct sympathetic  
443 input, and noradrenalin excites EC cells to release serotonin (Bellono et al., 2017). Based on  
444 these reports and our collective observations, we propose EC cells as an intestinal sensor using  
445 vagal outputs and sympathetic intestinal sensory feedback to modulate gastrointestinal motility.  
446 This proposal provides both molecular and systemic explanations for how rotavirus infection can

447 disrupt the autonomic balance. Furthermore, we suggest the nucleus of the solitary tract, the area  
448 postrema, and the BNST as central relay points of this feedback loop (Figure 7).

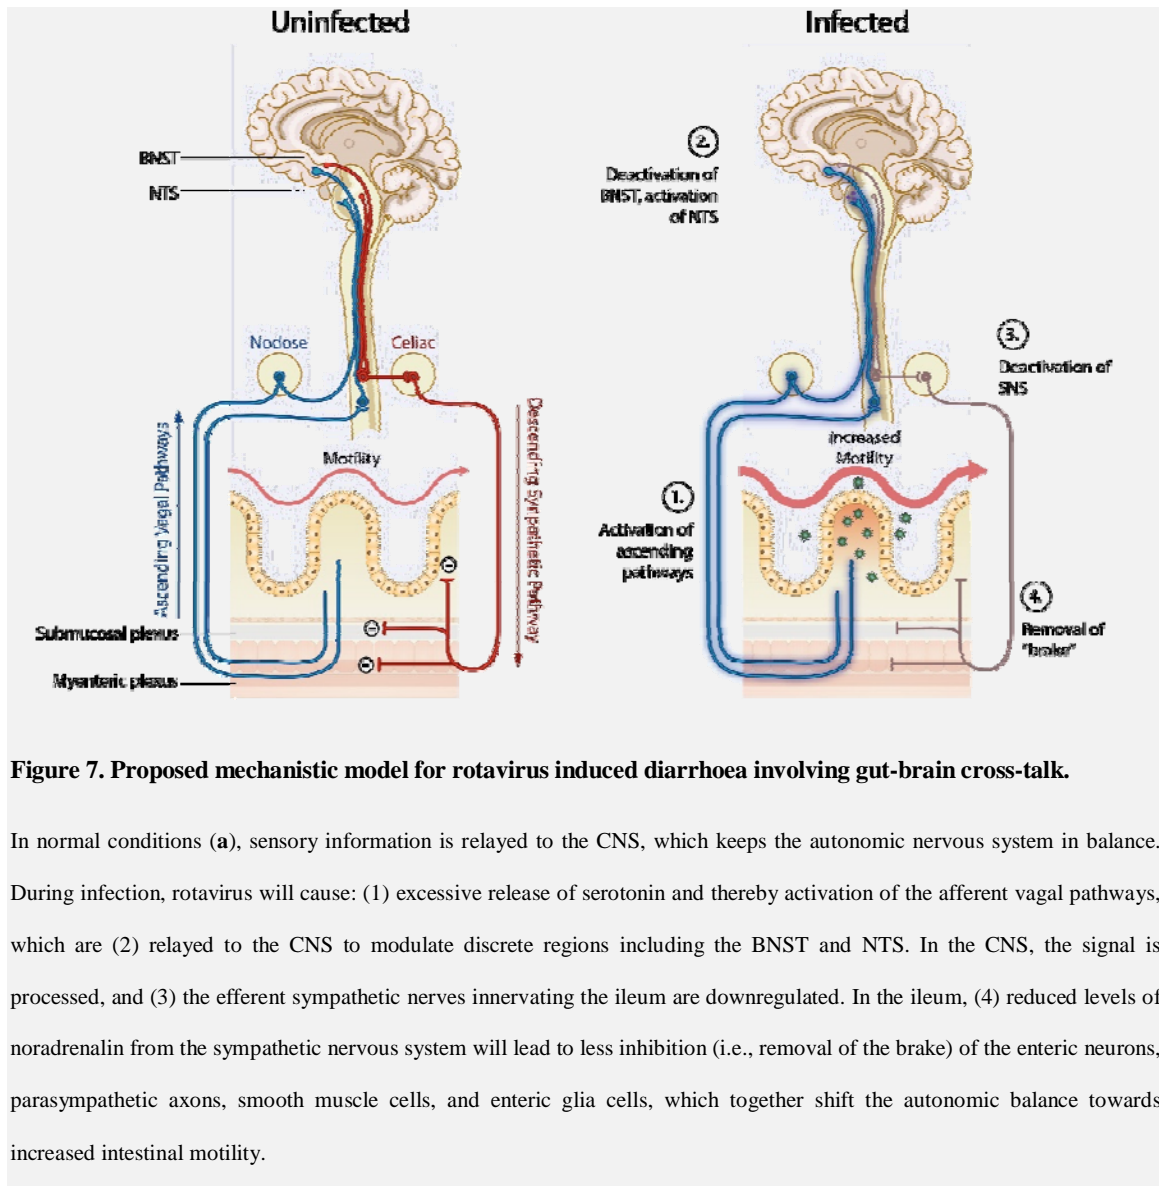

## 458 Conclusions

459 We showed and quantified the extent of rotavirus infection of the small intestine in 3D and  
460 identified centrally relayed downregulation of the sympathetic innervation of ileum, concomitant  
461 with increased intestinal transit and altered brain activity before onset of diarrhoea. We found

462 increased pS6 immunoreactivity in area postrema and decreased phosphorylated STAT5-  
463 immunoreactive neurons in the BNST, which has been associated with autonomic control  
464 including stress response. Collectively, our data provide novel information how rotavirus causes  
465 illness and communicate with nerves and the brain.

## 466 **Acknowledgements**

467 Financial support for this study was provided by the Swedish Research Council (Grants 2014-  
468 02827, 2017-01479, 2018-02862).

## 469 **Author contributions**

470 A.H., L.S., and M.H. designed the studies; A.H., L.S., and M.H. conducted the experiments;  
471 A.H. and M.H. analysed the data; A.H. wrote the manuscript with input from all authors. All  
472 authors read and approved the final manuscript.

## 473 **Competing interests**

474 The authors declare no conflicts of interest.

## 475 References

- 476 Ball, J. M., Tian, P., Zeng, C. Q. Y., Morris, A. P., & Estes, M. K. (1996). Age-dependent diarrhea induced by a  
477 rotaviral nonstructural glycoprotein. *Science*, *272*(5258), 101–104.  
478 <https://doi.org/10.1126/science.272.5258.101>
- 479 Bankhead, P., Loughrey, M. B., Fernández, J. A., Dombrowski, Y., McArt, D. G., Dunne, P. D., ... Hamilton, P.  
480 W. (2017). QuPath: open source software for digital pathology image analysis. *Scientific Reports*, *7*(1),  
481 16878. <https://doi.org/10.1038/s41598-017-17204-5>
- 482 Bardhan, P. K., Salam, M. A., & Molla, A. M. (1992). Gastric emptying of liquid in children suffering from acute  
483 rotaviral gastroenteritis. *Gut*, *33*(1), 26–29. <https://doi.org/10.1136/gut.33.1.26>
- 484 Bellono, N. W., Bayrer, J. R., Leitch, D. B., Castro, J., Zhang, C., O'Donnell, T. A., ... Julius, D. (2017).  
485 Enterochromaffin cells are gut chemosensors that couple to sensory neural pathways. *Cell*, *170*(1), 185-  
486 198.e16. <https://doi.org/10.1016/j.cell.2017.05.034>
- 487 Berthoud, H. R., & Powley, T. L. (1996). Interaction between parasympathetic and sympathetic nerves in  
488 prevertebral ganglia: morphological evidence for vagal efferent innervation of ganglion cells in the rat.  
489 *Microscopy Research and Technique*, *35*(1), 80–86. [https://doi.org/10.1002/\(SICI\)1097-  
490 0029\(19960901\)35:1<80::AID-JEMT7>3.0.CO;2-W](https://doi.org/10.1002/(SICI)1097-0029(19960901)35:1<80::AID-JEMT7>3.0.CO;2-W)
- 491 Bialowas, S., Hagbom, M., Nordgren, J., Karlsson, T., Sharma, S., Magnusson, K. E., & Svensson, L. (2016).  
492 Rotavirus and serotonin cross-talk in diarrhoea. *PLoS ONE*, *11*(7).  
493 <https://doi.org/10.1371/journal.pone.0159660>
- 494 Browning, K. N., & Travagli, R. A. (2014). Central nervous system control of gastrointestinal motility and  
495 secretion and modulation of gastrointestinal functions. *Comprehensive Physiology*, *4*(4), 1339–1368.  
496 <https://doi.org/10.1002/cphy.c130055>
- 497 Chang-Graham, A. L., Danhof, H. A., Engevik, M. A., Tomaro-Duchesneau, C., Karandikar, U. C., Estes, M. K.,  
498 ... Hyser, J. M. (2019). Human intestinal enteroids with inducible neurogenin-3 expression as a novel model  
499 of gut hormone secretion. *CMGH*, *8*(2), 209–229. <https://doi.org/10.1016/j.jcmgh.2019.04.010>
- 500 Chang-Graham, A. L., Perry, J. L., Engevik, M. A., Engevik, K. A., Scribano, F. J., Gebert, J. T., ... Hyser, J. M.  
501 (2020). Rotavirus induces intercellular calcium waves through ADP signaling. *Science (New York, N.Y.)*,  
502 *370*(6519). <https://doi.org/10.1126/science.abc3621>
- 503 Crawford, S. E., Ramani, S., Tate, J. E., Parashar, U. D., Svensson, L., Hagbom, M., ... Estes, M. K. (2017).  
504 Rotavirus infection. *Nature Reviews Disease Primers*, *3*(1), 17083. <https://doi.org/10.1038/nrdp.2017.83>
- 505 Daubner, S. C., Lauriano, C., Haycock, J. W., & Fitzpatrick, P. F. (1992). Site-directed mutagenesis of serine 40  
506 of rat tyrosine hydroxylase. Effects of dopamine and cAMP-dependent phosphorylation on enzyme activity.  
507 *The Journal of Biological Chemistry*, *267*(18), 12639–12646. Retrieved from  
508 <http://www.ncbi.nlm.nih.gov/pubmed/1352289>
- 509 Debellut, F., Clark, A., Pecenka, C., Tate, J., Baral, R., Sanderson, C., ... Atherly, D. (2021). Evaluating the  
510 potential economic and health impact of rotavirus vaccination in 63 middle-income countries not eligible for  
511 Gavi funding: a modelling study. *The Lancet. Global Health*. [https://doi.org/10.1016/S2214-  
512 109X\(21\)00167-4](https://doi.org/10.1016/S2214-109X(21)00167-4)
- 513 Fadero, T. C., Gerbich, T. M., Rana, K., Suzuki, A., DiSalvo, M., Schaefer, K. N., ... Maddox, P. S. (2018). LITE  
514 microscopy: Tilted light-sheet excitation of model organisms offers high resolution and low photobleaching.  
515 *Journal of Cell Biology*, *217*(5), 1869–1882. <https://doi.org/10.1083/jcb.201710087>
- 516 Foo, K. S., Hellysaz, A., & Broberger, C. (2014). Expression and colocalization patterns of calbindin-D28k,  
517 calretinin and parvalbumin in the rat hypothalamic arcuate nucleus. *Journal of Chemical Neuroanatomy*, *61*,  
518 20–32. <https://doi.org/10.1016/j.jchemneu.2014.06.008>
- 519 Furigo, I. C., Ramos-Lobo, A. M., Frazão, R., & Donato, J. (2016). Brain STAT5 signaling and behavioral  
520 control. *Molecular and Cellular Endocrinology*, *438*, 70–76. <https://doi.org/10.1016/j.mce.2016.04.019>
- 521 Furuichi, A., Makimoto, N., Ogishima, M., Nakao, K., Tsukamoto, M., Kanematsu, T., & Taniyama, K. (2001). In  
522 vivo assessment of the regulatory mechanism of cholinergic neuronal activity associated with motility in  
523 dog small intestine. *Japanese Journal of Pharmacology*, *86*(1), 73–78. <https://doi.org/10.1254/jjp.86.73>
- 524 Gershon, M. D. (1967). Inhibition of gastrointestinal movement by sympathetic nerve stimulation: the site of  
525 action. *The Journal of Physiology*, *189*(2), 317–327. <https://doi.org/10.1113/jphysiol.1967.sp008170>

- 526 Gillis, R. A., Quest, J. A., Pagani, F. D., & Norman, W. P. (2011). Control centers in the central nervous system  
527 for regulating gastrointestinal motility. In *Comprehensive Physiology* (pp. 621–683). Hoboken, NJ, USA:  
528 John Wiley & Sons, Inc. <https://doi.org/10.1002/cphy.cp060117>
- 529 Greenberg, H. B., & Estes, M. K. (2009). Rotaviruses: from pathogenesis to vaccination. *Gastroenterology*,  
530 *136*(6), 1939–1951. <https://doi.org/10.1053/j.gastro.2009.02.076>
- 531 Gulbransen, B. D., & Sharkey, K. A. (2012, November). Novel functional roles for enteric glia in the  
532 gastrointestinal tract. *Nature Reviews Gastroenterology and Hepatology*. *Nat Rev Gastroenterol Hepatol*.  
533 <https://doi.org/10.1038/nrgastro.2012.138>
- 534 Hagbom, M., De Faria, F. M., Winberg, M. E., Westerberg, S., Nordgren, J., Sharma, S., ... Svensson, L. (2020).  
535 Neurotrophic factors protect the intestinal barrier from rotavirus insult in mice. *MBio*, *11*(1).  
536 <https://doi.org/10.1128/mBio.02834-19>
- 537 Hagbom, M., Hellysaz, A., Istrate, C., Nordgren, J., Sharma, S., Meira de-Faria, F., ... Svensson, L. (2021). The  
538 5-HT3 receptor affects rotavirus-induced motility. *Journal of Virology*. [https://doi.org/10.1128/JVI.00751-](https://doi.org/10.1128/JVI.00751-21)  
539 [21](https://doi.org/10.1128/JVI.00751-21)
- 540 Hagbom, M., Istrate, C., Engblom, D., Karlsson, T., Rodriguez-Diaz, J., Buesa, J., ... Svensson, L. (2011).  
541 Rotavirus stimulates release of serotonin (5-HT) from human enterochromaffin cells and activates brain  
542 structures involved in nausea and vomiting. *PLoS Pathogens*, *7*(7), e1002115.  
543 <https://doi.org/10.1371/journal.ppat.1002115>
- 544 Holstege, G., Meiners, L., & Tan, K. (1985). Projections of the bed nucleus of the stria terminalis to the  
545 mesencephalon, pons, and medulla oblongata in the cat. *Experimental Brain Research*, *58*(2), 379–391.  
546 <https://doi.org/10.1007/BF00235319>
- 547 Hopkins, D. A., & Holstege, G. (1978). Amygdaloid projections to the mesencephalon, pons and medulla  
548 oblongata in the cat. *Experimental Brain Research*, *32*(4), 529–547. <https://doi.org/10.1007/BF00239551>
- 549 Istrate, C., Hagbom, M., Vikström, E., Magnusson, K.-E., & Svensson, L. (2014). Rotavirus infection increases  
550 intestinal motility but not permeability at the onset of diarrhea. *Journal of Virology*, *88*(6), 3161–3169.  
551 <https://doi.org/10.1128/JVI.02927-13>
- 552 Jänig, W. (1988). Integration of gut function by sympathetic reflexes. *Bailliere's Clinical Gastroenterology*, *2*(1),  
553 45–62. [https://doi.org/10.1016/0950-3528\(88\)90020-6](https://doi.org/10.1016/0950-3528(88)90020-6)
- 554 Kadowaki, M., Yoneda, S., & Takaki, M. (2003). Involvement of a purinergic pathway in the sympathetic  
555 regulation of motility in rat ileum. *Autonomic Neuroscience: Basic and Clinical*, *104*(1), 10–16.  
556 [https://doi.org/10.1016/S1566-0702\(02\)00257-6](https://doi.org/10.1016/S1566-0702(02)00257-6)
- 557 Knight, Z. A., Tan, K., Birsoy, K., Schmidt, S., Garrison, J. L., Wysocki, R. W., ... Friedman, J. M. (2012).  
558 Molecular profiling of activated neurons by phosphorylated ribosome capture. *Cell*, *151*(5), 1126–1137.  
559 <https://doi.org/10.1016/j.cell.2012.10.039>
- 560 Koikegami, H., Kimoto, A., & Kido, C. (1953). Studies on the amygdaloid nuclei and periamygdaloid cortex;  
561 experiments on the influence of their stimulation upon motility of small intestine and blood pressure.  
562 *Psychiatry and Clinical Neurosciences*, *7*(2), 87–108. <https://doi.org/10.1111/j.1440-1819.1953.tb00599.x>
- 563 Kordasti, S., Sjövall, H., Lundgren, O., & Svensson, L. (2004). Serotonin and vasoactive intestinal peptide  
564 antagonists attenuate rotavirus diarrhoea. *Gut*, *53*(7), 952–957. <https://doi.org/10.1136/gut.2003.033563>
- 565 Kordasti, Shirin, Istrate, C., Banasaz, M., Rottenberg, M., Sjövall, H., Lundgren, O., & Svensson, L. (2006).  
566 Rotavirus infection is not associated with small intestinal fluid secretion in the adult mouse. *Journal of*  
567 *Virology*, *80*(22), 11355–11361. <https://doi.org/10.1128/JVI.00152-06>
- 568 Kraft, L. M. (1958). Observations on the control and natural history of epidemic diarrhea of infant mice (EDIM).  
569 *The Yale Journal of Biology and Medicine*, *31*(3), 121–137. Retrieved from  
570 <https://pubmed.ncbi.nlm.nih.gov/13625735/>
- 571 Levitt, M., Spector, S., Sjoerdsma, A., & Udenfriend, S. (1965). Elucidation of the rate-limiting step in  
572 norepinephrine biosynthesis in the perfused guinea-pig heart. *The Journal of Pharmacology and*  
573 *Experimental Therapeutics*, *148*, 1–8. Retrieved from <http://www.ncbi.nlm.nih.gov/pubmed/14279179>
- 574 Lundgren, O. (2000). Sympathetic input into the enteric nervous system. In *Gut* (Vol. 47). BMJ Publishing Group.  
575 [https://doi.org/10.1136/gut.47.suppl\\_4.iv33](https://doi.org/10.1136/gut.47.suppl_4.iv33)
- 576 Lundgren, Ove, Peregrin, A. T., Persson, K., Kordasti, S., Uhnöo, I., & Svensson, L. (2000). Role of the enteric

- 577 nervous system in the fluid and electrolyte secretion of rotavirus diarrhea. *Science*, 287(5452), 491–495.  
578 <https://doi.org/10.1126/science.287.5452.491>
- 579 Lundgren, Ove, & Svensson, L. (2001). Pathogenesis of rotavirus diarrhea. *Microbes and Infection*, 3(13), 1145–  
580 1156. [https://doi.org/10.1016/s1286-4579\(01\)01475-7](https://doi.org/10.1016/s1286-4579(01)01475-7)
- 581 Mann, R., & Bell, C. (1993). Distribution and origin of aminergic neurones in dog small intestine. *Journal of the*  
582 *Autonomic Nervous System*, 43(2), 107–115. [https://doi.org/10.1016/0165-1838\(93\)90347-W](https://doi.org/10.1016/0165-1838(93)90347-W)
- 583 Menétrey, D., & de Pommery, J. (1991). Origins of Spinal Ascending Pathways that Reach Central Areas  
584 Involved in Visceroception and Visceronociception in the Rat. *European Journal of Neuroscience*, 3(3),  
585 249–259. <https://doi.org/10.1111/j.1460-9568.1991.tb00087.x>
- 586 Morris, A. P., & Estes, M. K. (2001). Microbes and microbial toxins: paradigms for microbial-mucosal  
587 interactions. VIII. Pathological consequences of rotavirus infection and its enterotoxin. *American Journal of*  
588 *Physiology. Gastrointestinal and Liver Physiology*, 281(2), G303-10.  
589 <https://doi.org/10.1152/ajpgi.2001.281.2.G303>
- 590 Nagatsu, T., Levitt, M., & Udenfriend, S. (1964). Tyrosine Hydroxylase. The initial step in norepinephrine  
591 biosynthesis. *The Journal of Biological Chemistry*, 239(2), 2910–2917. [https://doi.org/10.1097/00005792-](https://doi.org/10.1097/00005792-196405000-00019)  
592 [196405000-00019](https://doi.org/10.1097/00005792-196405000-00019)
- 593 Nasser, Y., Ho, W., & Sharkey, K. A. (2006). Distribution of adrenergic receptors in the enteric nervous system of  
594 the guinea pig, mouse, and rat. *Journal of Comparative Neurology*, 495(5), 529–553.  
595 <https://doi.org/10.1002/cne.20898>
- 596 Renier, N., Wu, Z., Simon, D. J., Yang, J., Ariel, P., & Tessier-Lavigne, M. (2014). iDISCO: a simple, rapid  
597 method to immunolabel large tissue samples for volume imaging. *Cell*, 159(4), 896–910.  
598 <https://doi.org/10.1016/j.cell.2014.10.010>
- 599 Schemann, M. (1991). Excitatory and inhibitory effects of norepinephrine on myenteric neurons of the guinea-pig  
600 gastric corpus. *Pflügers Archiv European Journal of Physiology*, 418(6), 575–580.  
601 <https://doi.org/10.1007/BF00370574>
- 602 Schultzberg, M., Hökfelt, T., Nilsson, G., Terenius, L., Rehfeld, J. F., Brown, M., ... Said, S. (1980). Distribution  
603 of peptide- and catecholamine-containing neurons in the gastro-intestinal tract of rat and guinea-pig:  
604 immunohistochemical studies with antisera to substance P, vasoactive intestinal polypeptide, enkephalins,  
605 somatostatin, gastrin/cholecystok. *Neuroscience*, 5(4), 689–744. [https://doi.org/10.1016/0306-](https://doi.org/10.1016/0306-4522(80)90166-9)  
606 [4522\(80\)90166-9](https://doi.org/10.1016/0306-4522(80)90166-9)
- 607 Sharkey, K. A., & Pittman, Q. J. (1996). The autonomic nervous system: peripheral and central integrative  
608 aspects. In *Comprehensive Human Physiology* (pp. 335–353). Springer Berlin Heidelberg.  
609 [https://doi.org/10.1007/978-3-642-60946-6\\_18](https://doi.org/10.1007/978-3-642-60946-6_18)
- 610 Trudrung, P., Furness, J. B., Pompolo, S., & Messenger, J. P. (1994). Locations and chemistries of sympathetic  
611 nerve cells that project to the gastrointestinal tract and spleen. *Archives of Histology and Cytology*, 57(2),  
612 139–150. <https://doi.org/10.1679/aohc.57.139>
- 613 Uhnoo, I., Riepenhoff-Talty, M., Dharakul, T., Chegas, P., Fisher, J. E., Greenberg, H. B., & Ogra, P. L. (1990).  
614 Extramucosal spread and development of hepatitis in immunodeficient and normal mice infected with  
615 rhesus rotavirus. *Journal of Virology*, 64(1), 361–368. <https://doi.org/10.1128/jvi.64.1.361-368.1990>
- 616 Wood, J. D., Alpers, D. H., & Andrews, P. L. R. (1999). Fundamentals of neurogastroenterology. *Gut*. BMJ  
617 Publishing Group. <https://doi.org/10.1136/gut.45.2008.ii6>

618

619

620 **Supplementary Videos**

621

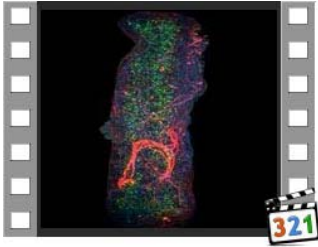

622

623 **Video 1. Supplementary video to Figure 1a**

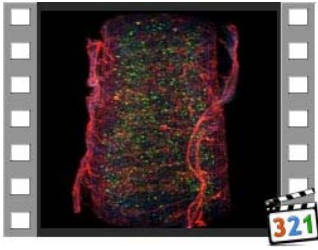

624

625 **Video 2. Supplementary video to Figure 1d**



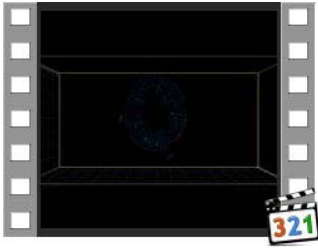

626

627 **Video 3. Supplementary video to Figure 1d**

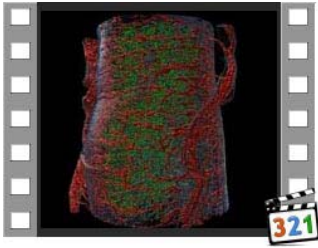

628

629 **Video 4. Supplementary video to Figure 1e**

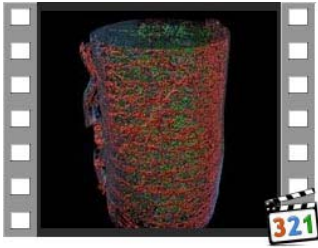

630

631 **Video 5. Supplementary video to Figure 1e**

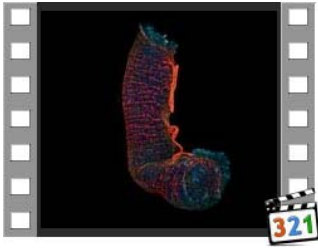

632

633 **Video 6. Supplementary video to Figure 2b**

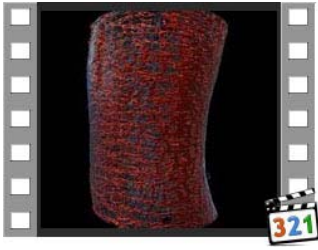

634

635 **Video 7. Supplementary video to Figure 2b**

## Number of Cells vs. Infection Volume

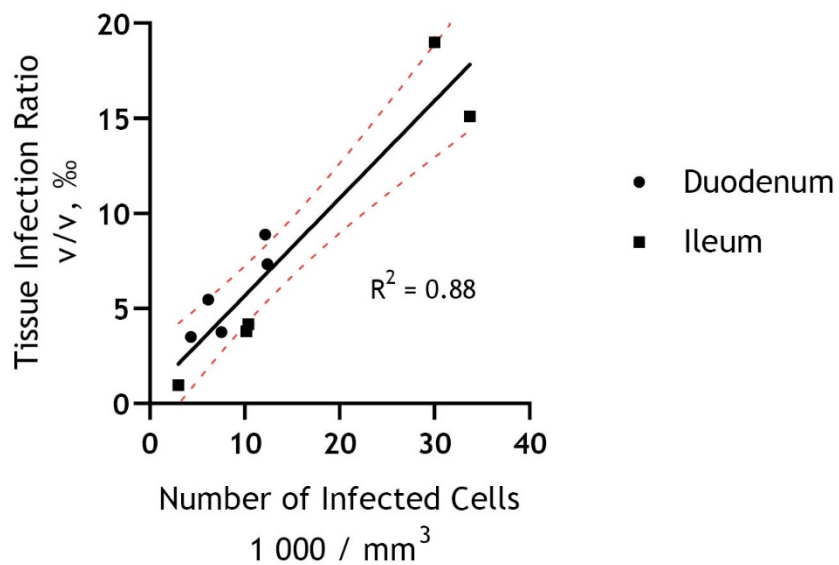

**Figure S1. Two different approaches to estimate the degree of infection yields similar results.**

Estimated relative number of infected cells plotted against tissue infection ratio show a linear relationship between the two approaches.

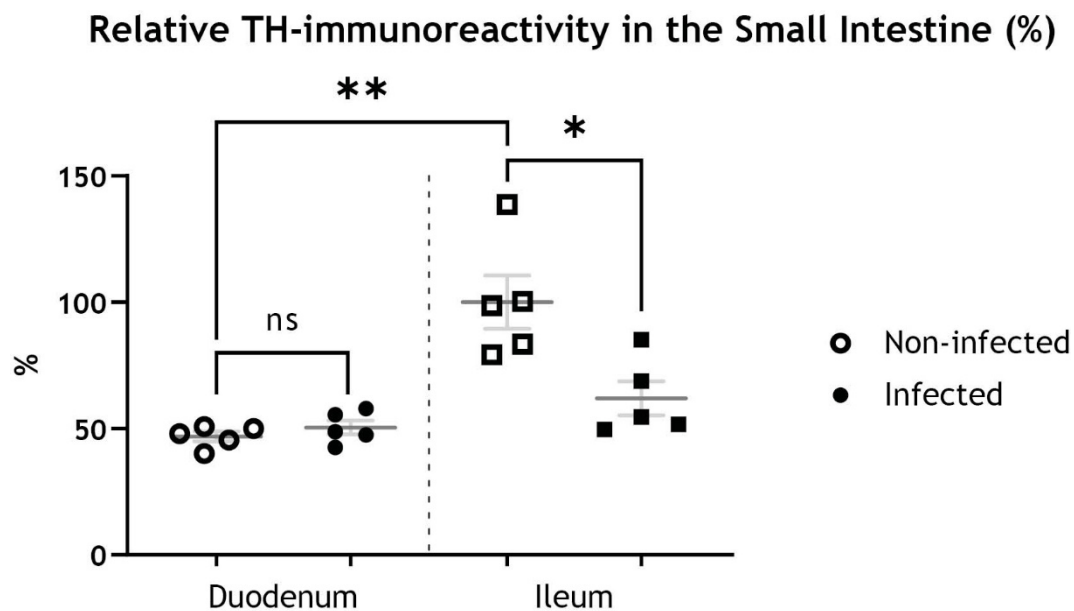

**Figure S2. Rotavirus infection reduces the amount of ileal TH-immunoreactivity.**

Supplementary graph to Figure 2.

Quantification of relative TH-immunoreactivity, statistically analysed with two-tailed unpaired (infected vs. non-infected) and paired (duodenum vs. ileum) t-tests show no significant (ns;  $p = 0.3236$ ) difference in duodenum of infected and non-infected animals, significant increase in ileum compared to duodenum of non-infected animals (\*\*;  $p = 0.0066$ ) and significant decrease in ileum of infected compared to non-infected animals (\*;  $p = 0.0157$ ). Data presented relative to average TH-immunoreactivity in non-infected ileum.

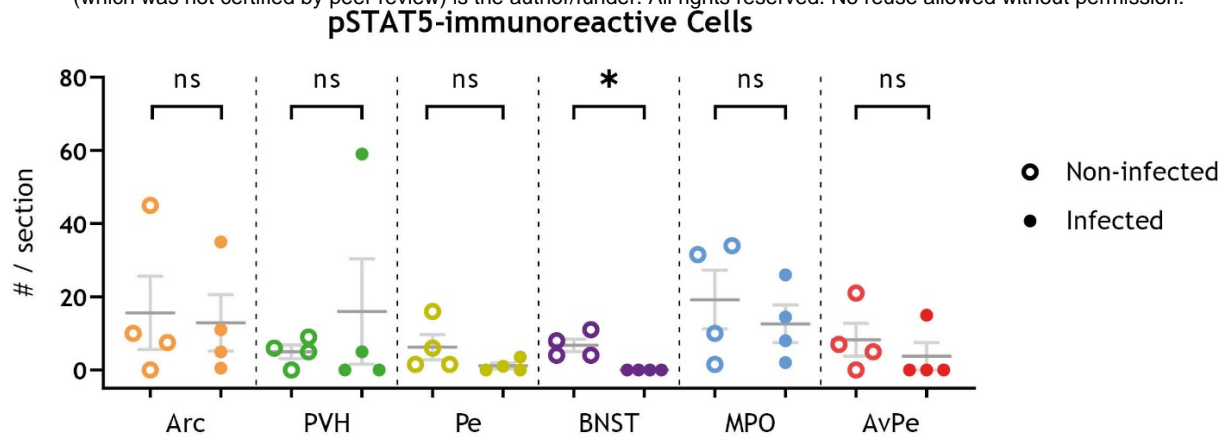

**Figure S3. Peripheral gastrointestinal rotavirus infection modulates pSTAT5 in the BNST but no hypothalamic regions.**

Supplementary data to Figure 4.

Quantification of pSTAT5-immunoreactive cell somata from infected and non-infected animals, statistically analysed with two-tailed Mann-Whitney test, identifies a decrease in the BNST ( $p = 0.0286$ ) but no significant difference in various hypothalamic regions.

Arc, arcuate nucleus of hypothalamus; AvPe, anteroventral periventricular nucleus; BNST, bed nucleus of stria terminalis; MPO, medial preoptic area; NTS, nucleus of the solitary tract; Pe, periventricular hypothalamic nucleus; pSTAT5, phosphorylated transducer and activator of transcription 5; PVH, paraventricular nucleus of hypothalamus.



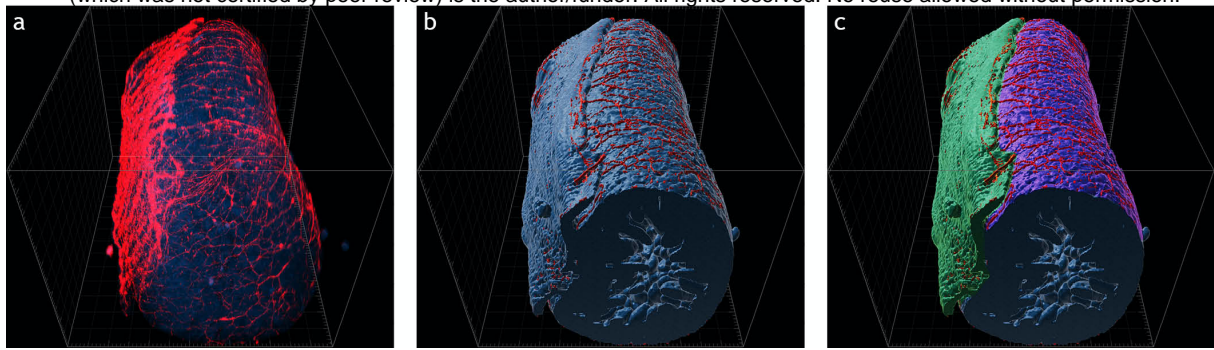

**Figure S4. 3D investigation reveals damaged tissues that can be excluded from analysis.**

Maximum intensity projection of light sheet micrograph stacks (a) from mouse ileum stained for tyrosine hydroxylase (TH; red) to mark sympathetic innervation of the intestine. Tissue visualized with autofluorescence (AF; blue). 3D surface reconstruction from (a) in (b, c). Muscularis (green) and submucosa (purple) pseudo-colored in (c). Note damage to the outer layer of the intestinal wall leaving the submucosal plexus exposed. Lack of myenteric plexus from tissue sample is hidden to the naked eye, barely detectable on micrographs, but fully identified with 3D surface modelling.
